# Supplementary material for: Controllable digital and analog resistive switching behavior of 2D layered WSe2 nanosheets for neuromorphic computing
Source: Royal Society of Chemistry journal article supplement (doi:10.1039/d2nr06580k), 2023-01-01
Supplement: d2nr06580k1.pdf [file d2nr06580k1.pdf]

Electronic Supplementary Material (ESI) for Nanoscale.

This journal is © The Royal Society of Chemistry 2022

## **Controllable digital and analog resistive switching behaviors of 2D layered WSe<sub>2</sub> nanosheets for neuromorphic computing**

Siqi Cheng,<sup>a</sup> Lun Zhong,<sup>a</sup> Jinxiang Yin,<sup>a</sup> Huan Duan,<sup>a</sup> Qin Xie,<sup>b</sup> Wenbo Luo,<sup>b</sup> Wenjing Jie<sup>\*a</sup>

*<sup>a</sup>College of Chemistry and Materials Science, Sichuan Normal University, Chengdu, 610066, China.*

*<sup>b</sup>State Key Laboratory of Electronic Thin Films and Integrated Devices, School of electronic Science and Engineering, University of Electronic Science and Technology of China, Chengdu, 610054, China.*

**Corresponding Author**

\*E-mail: [wenjing.jie@sicnu.edu.cn](mailto:wenjing.jie@sicnu.edu.cn)

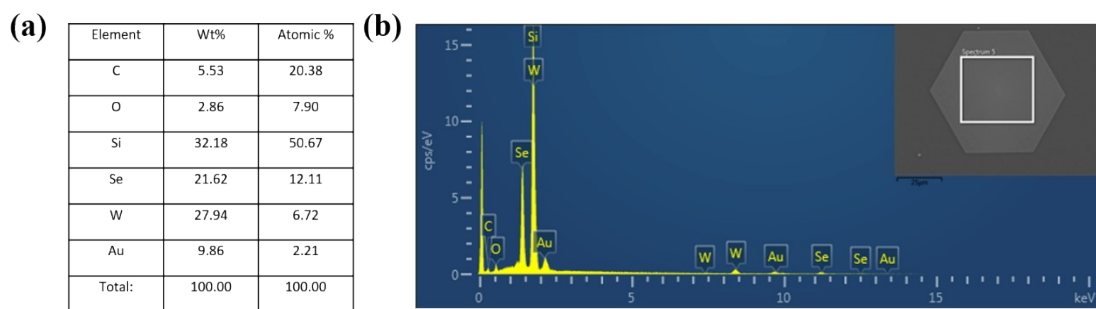

**Fig. S1.** Energy dispersive X-ray spectroscopy (EDS) analysis of the grown WSe<sub>2</sub> nanosheet. (a) Element weight percent of the WSe<sub>2</sub> nanosheet. (b) EDS spectrum of the WSe<sub>2</sub> nanosheet.

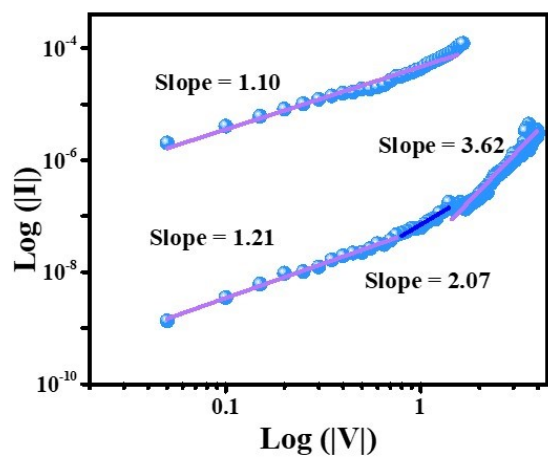

**Fig. S2.** The negative part of the current–voltage ( $I$ – $V$ ) curve in double logarithmic coordinates.

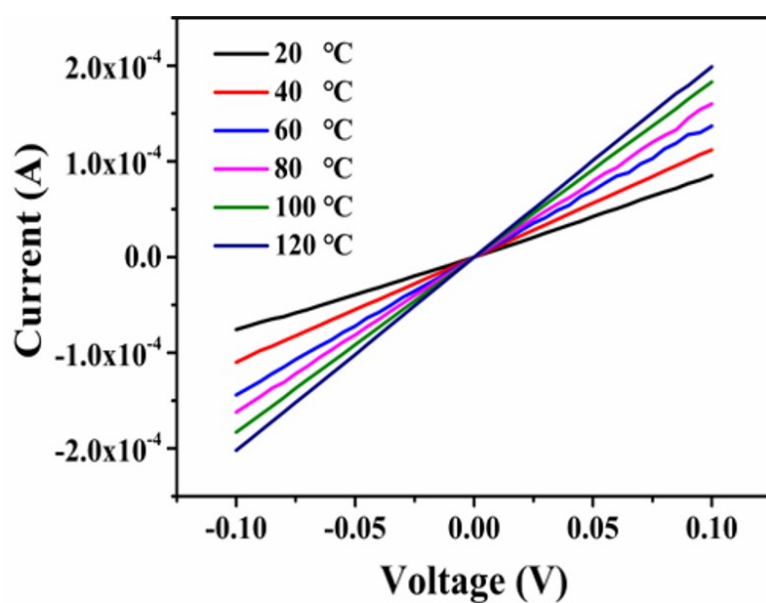

**Fig. S3.** The temperature dependent conductive behaviors of the WSe<sub>2</sub>-based memristor at the low resistance state. As the temperature increases, the current increases, indicating the semiconducting conductive behaviors rather than the metallic conductance.

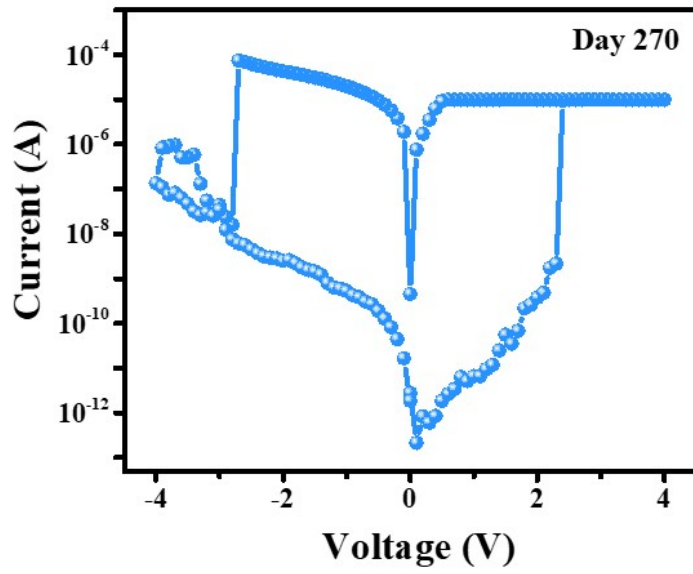

**Fig. S4.** The  $I$ - $V$  curve of the Pt/WSe<sub>2</sub>/Pt memristor for day 270 under ambient air condition. The non-volatile RS behavior can be maintained well.

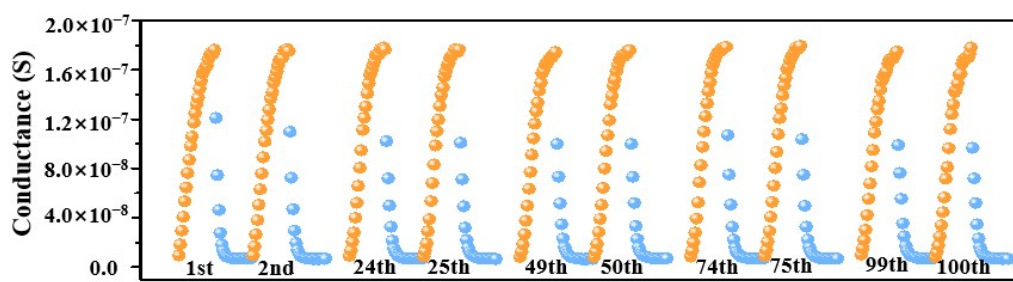

**Fig. S5.** Endurance test for the synaptic device in 100 LTP/LTD cycles. The selected cycles demonstrate consistent linearity and conductance margin.

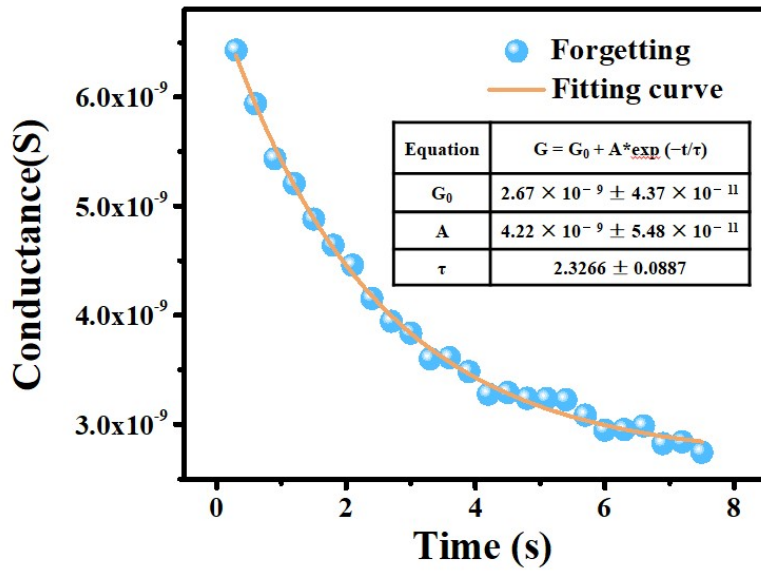

**Fig. S6.** The fitted forgetting curve of the synaptic memristor.

The forgetting process is fitted by an exponential decay with the equation of  $G = G_0 + A \cdot \exp(-t/\tau)$ , where  $G$  is the recorded conductance,  $G_0$  is the final conductance,  $A$  is the pre-factor, and  $\tau$  is the relaxation time. For our synaptic memristor, the conductance decreases exponentially. By fitting the forgetting process, it can be concluded that the conductance decreases exponentially and finally can be retained at  $G_0$  (2.67 nS). Thus, 41% in the conductance can be retained in the end after the forgetting process

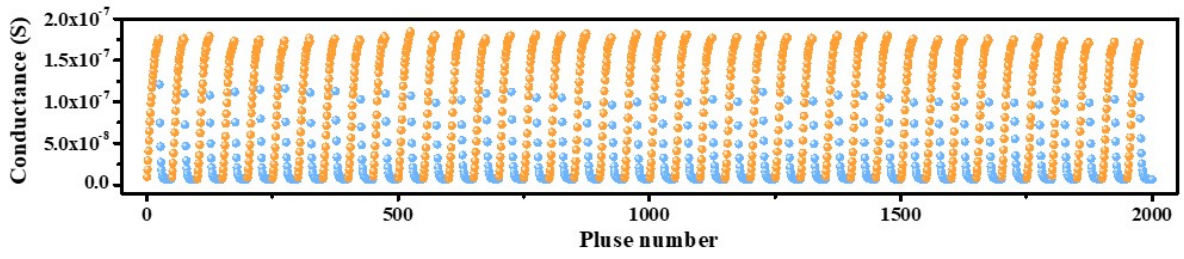

**Fig. S7.** The 40 sets of LTP/LTD cycles.
